# Supplementary material
Source: MDPI journal article supplement (https://www.mdpi.com/2297-8739/8/10/181)
Supplement: s1 [file s1]

# Supplementary Materials

## An Index for Quantitative Evaluation of the Mixing in Ethanol Precipitation of Traditional Chinese Medicine

Yanni Tai <sup>1,2†</sup>, Jingjing Pan <sup>1,2†</sup>, Haibin Qu <sup>1,2</sup> and Xingchu Gong <sup>1,2\*</sup>

<sup>1</sup> Pharmaceutical Informatics Institute, College of Pharmaceutical Sciences, Zhejiang University, Hangzhou 310058, China; taiyn@zju.edu.cn (Y.T.); 21819006@zju.edu.cn (J.P.); quhb@zju.edu.cn (H.Q.)

<sup>2</sup> Innovation Center in Zhejiang University, State Key Laboratory of Component-Based Chinese Medicine, Hangzhou 310058, China

\* Correspondence: gongxingchu@zju.edu.cn

† Yanni Tai and Jingjing Pan contributed equally to this work

**Table S1** WMR values, total solid removal rate, lobetyolin retention rates on different addition modes.

| Addition modes                                   | WMR value (%) | Total solid removal rate (%) | Retention rate of lobetyolin (%) |
|--------------------------------------------------|---------------|------------------------------|----------------------------------|
| Concentrate added dropwise into ethanol solution | 76.3±2.05     | 60.4±1.97                    | 70.2±3.35                        |
|                                                  | 64.7±2.38     | 57.3±5.36                    | 56.9±1.72                        |
|                                                  | 65.4±1.85     | 58.6±6.43                    | 56.3±1.75                        |
| Ethanol solution added dropwise into concentrate | 100.5±3.17    | 56.8±2.77                    | 79.6±0.82                        |
|                                                  | 93.5±1.70     | 58.8±4.23                    | 77.5±2.27                        |
|                                                  | 87.1±1.63     | 59.7±8.01                    | 72.3±2.30                        |

The results are expressed as mean ± standard deviations,  $n = 3$ .

**Table S2** WMR values under different stirring speeds (200, 300, 400, and 500 rpm) and different total solid content of the concentrate (45%, 55%, and 60%) on stirring devices.

| Total solid content (%) | Stirring speed (rpm) |            |            |           |
|-------------------------|----------------------|------------|------------|-----------|
|                         | 200                  | 300        | 400        | 500       |
| 45                      | 85.5±4.55            | 100.5±6.63 | 105.7±3.63 | 98.0±2.08 |
| 55                      | 56.8±4.12            | 62.6±3.56  | 73.6±3.47  | 77.4±2.23 |
| 60                      | 20.8±4.75            | 31.6±2.70  | 34.3±6.84  | 38.2±2.30 |

The results are expressed as mean ± standard deviations,  $n = 3$ .

**Table S3** WMR values, total solid removal rate, lobetyolin retention rates under different concentrate flow rates on the micromesh mixer.

| Concentrate flow rate (mL/min) | WMR value (%) | Total solid removal rate (%) | Retention rate of lobetyolin (%) |
|--------------------------------|---------------|------------------------------|----------------------------------|
| 40                             | 98.9±6.42     | 57.1±0.88                    | 83.8±2.90                        |
| 60                             | 105.7±5.11    | 54.0±0.70                    | 89.7±0.88                        |
| 80                             | 105.2±4.41    | 51.2±2.82                    | 91.0±2.47                        |

The results are expressed as mean  $\pm$  standard deviations,  $n = 3$ .

**Table S4** WMR values under different membrane pore sizes on a membrane dispersion micromixer.

| Membrane pore size (mm) | 10              | 18              | 23              | 15              |
|-------------------------|-----------------|-----------------|-----------------|-----------------|
| WMR value               | 42.4 $\pm$ 1.81 | 71.8 $\pm$ 6.11 | 91.4 $\pm$ 3.53 | 93.5 $\pm$ 5.17 |

The results are expressed as mean  $\pm$  standard deviations,  $n = 3$ .

**Table S5** WMR values under different mixing chamber widths on a membrane dispersion micromixer.

| Mixing chamber width (mm) | 1.0             | 2.0           | 3.0             | 4.0             |
|---------------------------|-----------------|---------------|-----------------|-----------------|
| WMR value                 | 91.4 $\pm$ 3.53 | 84 $\pm$ 0.72 | 65.1 $\pm$ 4.31 | 53.5 $\pm$ 3.51 |

The results are expressed as mean  $\pm$  standard deviations,  $n = 3$ .

**Table S6** WMR values under different mixing chamber depths on a membrane dispersion micromixer.

| Mixing chamber depth (mm) | 0.5             | 1.0             | 1.5             | 2.0             |
|---------------------------|-----------------|-----------------|-----------------|-----------------|
| WMR value                 | 91.4 $\pm$ 3.53 | 73.1 $\pm$ 4.26 | 72.6 $\pm$ 3.66 | 70.3 $\pm$ 3.08 |

The results are expressed as mean  $\pm$  standard deviations,  $n = 3$ .

**Table S7** WMR values under different concentrate flow rates, ECR on a membrane dispersion micromixer.

| Flow rate (mL/min) | RCR (g/g)        |                  |                  |
|--------------------|------------------|------------------|------------------|
|                    | 1.0              | 1.5              | 2.0              |
| 15                 | –                | 48.4 $\pm$ 0.19  | 51.2 $\pm$ 1.67  |
| 30                 | 68.8 $\pm$ 1.64  | 69.0 $\pm$ 1.16  | 71.4 $\pm$ 2.30  |
| 45                 | –                | 87.1 $\pm$ 1.01  | 84.1 $\pm$ 1.46  |
| 60                 | 103.1 $\pm$ 1.94 | 103.8 $\pm$ 3.29 | 102.6 $\pm$ 2.63 |
| 75                 | –                | 103.5 $\pm$ 4.98 | –                |
| 90                 | 99.4 $\pm$ 2.65  | –                | –                |
| 120                | 97.3 $\pm$ 2.70  | –                | –                |

The results are expressed as mean  $\pm$  standard deviations,  $n = 3$ . “–” means these factor levels were not be measured.
